# Supplementary material for: Effects of Nutritional Interventions on Accuracy and Reaction Time with Relevance to Mental Fatigue in Sporting, Military, and Aerospace Populations: A Systematic Review and Meta-Analysis
Source: MDPI journal article supplement (doi:10.3390/ijerph19010307), 2021-12-28
Supplement: s1 [file s1]

## Risk of bias changes and exclusion details

| Item removed                                                                                                                                                                                                                                                                                                        | Rationale for removal                                                                                                                                                                                                                                                                                                                                           |
|---------------------------------------------------------------------------------------------------------------------------------------------------------------------------------------------------------------------------------------------------------------------------------------------------------------------|-----------------------------------------------------------------------------------------------------------------------------------------------------------------------------------------------------------------------------------------------------------------------------------------------------------------------------------------------------------------|
| Q13<br>Were the staff, places, and facilities where the patients were treated, representative of the treatment the majority of patients receive?                                                                                                                                                                    | These details are not typically reported in sport science, military, and aerospace studies. This item relates closer to <i>clinical</i> treatment of patients.                                                                                                                                                                                                  |
| Q9<br>Have the characteristics of patients lost to follow-up been described?                                                                                                                                                                                                                                        | Participants are not typically lost to follow-up in typically reported in sport science, military, and aerospace studies. This would only apply to with chronic nutrition interventions, and studies relevant to the topic of this meta-analysis were likely to be too acute/short-term to warrant including this item.                                         |
| Q16<br>If any of the results of the study were based on “data dredging”, was this made clear?                                                                                                                                                                                                                       | Details are data dredging are rarely required in research relevant to this meta-analysis and were therefore not reported.                                                                                                                                                                                                                                       |
| Q17<br>In trials and cohort studies, do the analyses adjust for different lengths of follow-up of patients, or in case-control studies, is the time period between the intervention and outcome the same for cases and controls?                                                                                    | Follow-ups are likely only relevant for parallel-group design studies with chronic nutrition interventions (e.g., 7- or 28-day supplementation). The majority of studies focused on acute interventions. Therefore, the lengths of follow-up are typically identical, thus, this item is largely irrelevant to sport science, military, and aerospace research. |
| Item/s adapted                                                                                                                                                                                                                                                                                                      | Rationale for adaptation                                                                                                                                                                                                                                                                                                                                        |
| Q5<br>"Are the distributions of principal confounders in each group of subjects to be compared clearly described? A list of principal confounders is provided.<br><br>Adaptation:<br>The list of principal confounders included cognitive ability, caffeine intake, energy drink usage, supplements, fitness, sleep | Provided clarity of confounders relevant to performance outcomes in sport science, military, and aerospace research.                                                                                                                                                                                                                                            |
